# Supplementary material for: Effects of physiatrist and registered therapist operating acute rehabilitation (PROr) in patients with stroke
Source: PLoS One. 2017 Oct 26;12(10):e0187099. doi: 10.1371/journal.pone.0187099 (PMC5658147; doi:10.1371/journal.pone.0187099)
Supplement: S1 File — This file is raw data of Glasgow Coma Scale, National Institute of Health Stroke Scale, modified Rankin Scale (mRS) and Functional Independence Measure. (XLSX) [file pone.0187099.s001.xlsx]

## Sheet: Sheet1
Gendar			Age			Height			Weigh			Type of stroke (Hemorrhage / infarction)			Time spent in rehabilitation per person (min/day)			Duration of hospital stay (days)
24<	24-48	>48	24<	24-48	>48	24<	24-48	>48	24<	24-48	>48	24<	24-48	>48	24<	24-48	>48	24<	24-48	>48
m	m	m	69	70	56	168.3	165	173.5	50.5	70	81.5	i	i	i	85	95	55	6	42	8
m	m	m	54	41	83	185	165	177	80	65	60	i	h	i	85.4545	105.455	50	15	19	3
f	m	m	78	73	81	150	161	175	45	79	70	i	i	i	88.8889	58	76.9231	14	16	21
m	f	m	80	62	80	163	162	148.7	69.4	76	37.4	h	i	i	80	57.7778	36.8421	7	15	31
m	f	m	80	84	89	174	145	168	68	37	60	i	i	i	85	85	80	25	9	9
f	m	m	88	80	67	145	155	163	40	52	61	h	i	h	92	85	57.1429	7	11	23
f	m	f	67	65	82	166	170	151	72	79	52	i	i	i	40	80	104.348	5	7	36
m	f	m	61	88	88	164	155	172	63	55	50	i	i	h	40	103.333	53.3333	3	9	15
f	f	f	86	88	80	150	150	160	48	40	45	i	i	i	80	87.2727	71.4286	14	16	11
m	f	f	54	82	91	173	154	150	94	54	40	i	i	i	76	105.333	78.3333	6	21	19
f	f	f	47	79	80	153	148	154	62	44	90	i	i	i	89.2308	36.6667	108.889	20	16	17
f	m	m	81	77	54	148	161	160	65	55	68	h	h	h	108.333	36.6667	92	20	8	10
m	m	m	28	77	77	160	167	150	58	80	53	h	i	i	70	50	45.3333	7	5	18
m	m	f	76	79	92	164.8	169.5	152	80.2	76.3	41	i	i	h	85.8824	33.3333	93.3333	26	17	9
f	m	f	85	86	79	150	160	152	40	50	43	i	h	i	83.3333	45.5556	48.5714	25	28	23
m	m	m	43	84	80	163	160	154.8	74	65	42.6	h	i	i	36.6667	87.8947	75.5556	19	62	58
m	f	m	83	78	59	170	156	162.6	59	52	63	i	h	i	77.1429	46.6667	60	10	13	8
m	f	m	81	66	67	165	157	163	55	68	74.5	i	i	i	52.7273	30	84	16	9	11
f	m	f	95	75	86	150	175	150	45	65	70	i	h	i	75	60	98.4615	10	13	22
m	m	m	74	80	73	168	159	167	60	60	70.3	i	i	i	37.1429	108.889	86.6667	12	14	16
m	f	f	55	61	87	175	154	155	99	69	40	i	i	h	69.3333	30	98.3333	24	4	18
f	f	m	92	64	61	145	160	175	42	60	80	i	i	i	80	20	85.7143	21	4	13
f	f	f	82	86	85	150	144	150	60	38	35	i	i	h	100	96.25	88.8889	11	24	13
f	m	f	94	85	90	146	165	144	37	45	51	i	h	h	56.6667	30	103.75	11	3	26
m	f	m	80	89	64	161	150	168	61.5	50	72	i	i	h	112.5	45	52.5	13	7	28
m	m	m	63	86	89	175	175	158	80	68	45	h	i	i	84	100	36.6667	8	11	10
f	f	m	98	92	85	145	155	158	42	70	63	i	i	i	62.2222	106	40	11	16	13
f	f	f	78	98	93	150	151	150	52	50	40	h	i	h	66.6667	80	104	9	16	40
m	f	m	73	75	51	171	147	180	84	61	80	h	i	i	30	90.9091	70	7	18	20
m	m	m	84	62	44	165	175	166	62	75	82	h	i	h	86.6667	64.4444	88.8889	14	15	15
f	m	m	69	61	90	150	167	155	80	60	42	h	i	i	110	90	70	13	7	18
m	f	m	49	90	84	170	152	165.7	80	50.83	68.4	h	i	i	83.5294	85.3333	69	29	23	34
f	f	m	75	81	68	160	142	171	47	62	68	h	i	i	78	89.0909	90	15	18	5
f	m	f	81	87	88	155	154	140	40	48	52	i	i	i	96.6667	96.6667	56.5217	37	9	38
f	m	f	65	87	65	160	161	165	62	63	70	h	i	h	90	101.111	30	13	28	4
m	f	f	83	42	89	164	154	150	61	46	48	i	i	i	85.7143	103.077	40	12	19	16
m	m	f	78	85	74	160	165	150	50	65	70	i	i	i	70	74.6667	108.333	24	23	19
m	f	m	68	89	78	169	145	164	70	39	69.5	i	i	i	46.6667	23.75	60.9091	8	26	34
f	f	f	77	77	88	145	152	145	49.6	50	40	h	i	i	66.6667	80	83.3333	9	23	9
f	m	m	53	65	85	150	156	165	48	55	64	h	i	i	40	105.714	73.3333	17	22	20
m	m	f	67	79	62	161	154	163	74	55	56	i	i	i	57.7778	60	98.4615	13	4	32
m	f	f	81	88	80	168	157	155	55	41	56	h	i	i	111.429	74.5455	90	13	32	20
f	f	m	54	63	57	161	152	160	60	60	62	i	i	i	62.2222	20	56	9	8	8
m	m	m	52	85	56	170	163	160	60	45	52	i	i	h	37.7778	86.6667	30	15	9	7
f	f	m	85	91	83	145	149	150	60	40	40	h	h	h		72.7273	40		19	10
f	m	m	73	79	83	153	162	167	49	60	65	i	h	i		72.7273	53.3333		19	17
f	m	m	82	63	77	140	160	166.8	47.8	70	70	h	i	i		43.3333	77.1429		11	12
	f	m		67	67		152.5	168		53.1	54.2		i	i		74.5455	97.5		18	16
	f	f		80	80		155	140		60	60		h	i		76.3636	83.8462		17	38
	f	m		73	87		160	157		55	43		i	h		72	88		16	10
	f	f		81	89		142	145		40	50		i	i		67.1429	76.25		22	22
	m	m		79	73		157.4	169		54.8	72		i	i		36.4706	38		26	33
	f	f		86	79		146	155		50	45		i	h		82.6667	72.5		25	13
	f	m		89	73		155	160		50	60		i	h		35.2941	64		30	10
	m	f		90	83		155	152		39.3	52		i	h		66	28		15	12
	f	m		90	52		145	176		40	67		i	i		40	112.632		5	30
	f	m		89	86		150	172		50	64		i	i		80	62		19	34
	f	f		67	88		157	152		47	50		i	i		76	80		31	10
	m	m		74	73		160	160		60	42		h	i		64.4444	101.818		15	18
	f	m		84	78		160	168		55	66		i	i		57.1429	20		12	16
	f	m		80	93		155	150		61.6	36		i	h		68	60		8	20
	m	m		64	58		170	165		67	54		i	h		53.3333	91.4286		6	24
	f	m		72	57		150	170		60	76.8		h	h		76	64		15	10
	f	m		94	78		150	165		34	62		h	h		66.6667	35		6	43
	m	m		86	53		165	165		60	54		i	i		70	46.6667		12	8
	m	m		49	89		165	160		63	60		i	i		81.6667	50		9	28
	f	f		80	79		150	148		42	44		i	i			75			20
	m	f		87	99		158	153		65	47		i	i			62.8571			13
	m	f		43	84		180	150		64	35		i	i			61.6667			20
	m	f		72	91		177	140		68	45		i	h			50			13
	m	m		95	33		156	165		55	65		i	h			63.5294			27
	m	m		65	83		167	157		71	37		i	h			60			11
	m	m		77	68		168	165		80	69		i	h			36.6667			13
	f	f		82	65		160	150		48	37		i	i			103.636			33
	m	f		85	90		157	143		53	44		i	h			69.2308			25
	m	f		63	83		165	155		60	51		i	i			76.3636			21
	f	m		86	66		155	172		70	65		i	i			64.2424			52
		m			76			155			52			h			76.6667			14
		m			78			168			59			h			89.2308			25
		f			83			147			39			i			75			12
		f			91			150			40			i			80			21
		m			86			160			55			i			70			9
		m			90			163			43			i			65.4545			13
		f			76			152			52			i			93.8462			24
		m			65			169			75			h			44			16
		m			81			145			52			h			84			20
		f			73			150			65			h			20			17
		f			81			151			52			h			84			13
		m			88			163.5			45			i			86.1538			28
		m			74			173			76			i			20			32
		f			93			148			50			i
		m			79			154.7			43.5			h
		m			89			155			55			i
		f			76			151			56			i
		f			78			155			50			i
		f			81			148			40			i
		f			82			158			52			i
		m			84			155.8			58.8			i
		f			66			149			49			i
		m			64			162			60			i
		f			82			145			44.5			i
		f			89			149			38			i
		f			80			156			52			h

## Sheet: Sheet2
Total FIM (First rehabilitation)			Total FIM (Discharge)			mortor subscale (First rehabilitation)			mortor subscale (Discharge)			Cognition subscale (First rehabilitation)			Cognition subscale (Discharge)			NIHSS (First rehabilitation)			NIHSS (Discharge)			mRS (First rehabilitation)			mRS (Discharge)			GCS (First rehabilitation)			GCS (Discharge)
24<	24-48	>48	24<	24-48	>48	24<	24-48	>48	24<	24-48	>48	24<	24-48	>48	24<	24-48	>48	24<	24-48	>48	24<	24-48	>48	24<	24-48	>48	24<	24-48	>48	24<	24-48	>48	24<	24-48	>48
82	47	125	107	63	125	47	17	90	81	33	90	35	30	35	26	30	35	3	11	2	2	7	2	4	4	2	2	4	1	14	15	15	15	15	15
82	37	100	122	89	110	48	16	65	87	54	75	34	21	35	35	35	35	2	13	5	0	11	5	5	5	3	3	4	3	15	14	15	15	15	15
34	118	18	50	126	26	16	83	13	28	91	21	18	35	5	22	35	5	12	0	28	8	0	18	5	1	5	4	0	5	14	15	7	15	15	11
43	20	104	100	20	124	13	13	69	65	13	89	30	7	35	35	7	35	5	20	2	3	15	0	5	5	4	3	5	3	15	14	15	15	15	15
20	34	33	35	64	52	13	16	23	21	41	42	7	18	10	14	23	10	21	12	7	13	12	5	5	5	5	5	5	4	10	15	14	14	15	14
64	74	18	126	86	21	44	45	13	91	56	13	20	29	5	35	30	8	3	3	28	0	3	25	2	5	5	1	5	5	14	15	5	15	15	7
81	109	18	120	112	31	46	74	13	85	77	19	35	35	5	35	35	12	2	1	22	0	0	13	4	4	5	1	4	5	15	15	12	15	15	14
31	86	30	72	94	31	15	55	19	44	63	20	16	31	11	28	31	11	2	5	19	0	2	18	4	4	5	4	4	5	13	15	12	15	15	13
97	45	27	126	110	60	62	28	16	91	82	35	35	17	11	35	28	25	1	4	10	0	2	6	1	1	5	1	1	5	15	14	15	15	15	15
110	19	48	125	66	105	76	13	18	91	51	75	34	6	30	34	15	30	2	13	2	2	3	1	1	5	4	1	4	3	15	10	15	15	13	15
31	98	65	64	114	108	21	63	48	45	79	91	10	35	17	19	35	17	8	1	4	4	1	2	5	4	4	4	1	1	14	15	15	15	15	15
77	103	102	120	118	122	57	68	67	89	88	87	20	35	35	31	30	35	4	0	0	1	0	0	3	2	4	1	1	1	15	15	15	15	15	15
72	115	18	84	125	18	40	84	13	51	90	13	32	31	5	33	35	5	5	2	36	5	1	24	4	3	5	4	1	5	15	15	6	15	15	12
21	18	99	29	18	122	13	13	64	16	13	87	8	5	35	13	5	35	15	22	4	13	22	3	5	5	4	5	5	2	7	4	15	13	4	15
80	18	28	126	20	81	45	13	13	91	13	46	35	5	15	35	7	35	3	31	13	1	23	4	4	5	5	2	5	4	15	7	13	15	11	15
34	18	32	70	26	42	17	13	13	49	19	17	17	5	19	21	7	25	3	22	14	3	17	12	5	5	5	4	5	5	15	9	13	15	11	14
33	42	74	58	51	93	20	13	48	41	22	67	13	29	26	17	29	26	3	11	2	3	9	0	4	5	4	4	4	4	15	15	15	15	15	15
20	106	81	43	126	85	13	71	46	24	91	50	7	35	35	19	35	35	10	0	2	5	0	2	5	3	5	4	1	4	13	15	15	15	15	15
22	94	80	94	117	106	15	59	53	69	82	77	7	35	27	25	35	29	6	2	8	2	1	5	5	3	4	3	2	2	13	15	15	15	15	15
93	92	20	126	126	24	58	57	13	91	91	13	35	35	7	35	35	11	0	6	29	0	0	21	3	3	5	0	1	4	15	15	7	15	15	13
19	93	87	43	105	114	13	63	52	36	75	79	6	30	35	7	30	35	21	0	3	7	0	3	5	1	5	5	0	3	12	15	15	14	15	15
38	18	21	65	18	74	21	13	14	48	13	45	17	5	7	17	5	29	14	24	13	4	24	7	4	5	5	3	5	4	12	8	13	15	8	15
27	38	33	83	66	36	18	13	13	59	41	13	9	25	20	24	25	23	7	3	16	3	3	12	5	5	5	3	4	5	12	15	14	15	15	15
70	28	18	103	28	75	40	17	13	73	17	48	30	11	5	30	11	27	2	5	14	0	5	10	5	5	5	4	5	5	15	14	14	15	14	15
49	34	18	93	45	19	19	23	13	63	35	13	30	11	5	30	10	6	11	5	32	7	1	32	5	5	5	1	5	5	15	14	9	15	15	10
46	102	95	57	108	102	17	75	68	28	79	72	29	27	27	29	29	30	7	1	2	6	1	2	5	2	4	5	1	3	15	15	14	15	15	14
56	28	23	63	68	35	26	13	13	28	52	23	30	15	10	35	16	12	8	17	9	6	13	6	5	5	5	4	4	5	15	15	13	15	15	14
45	20	87	124	35	110	15	13	63	89	25	83	30	7	24	35	10	27	3	17	3	1	14	2	2	5	4	2	5	3	15	12	15	15	12	15
93	113	18	124	119	64	58	78	13	89	84	29	35	35	5	35	35	35	0	2	29	0	1	14	4	2	5	4	2	4	15	15	7	15	15	15
58	100	21	71	114	64	38	66	16	48	80	50	20	34	5	23	34	14	25	5	7	14	5	5	5	4	3	5	3	3	13	15	12	15	15	14
38	78	46	87	113	120	13	43	21	52	78	90	25	35	25	35	35	30	9	6	2	5	2	1	4	4	4	4	3	2	14	15	15	15	15	15
71	24	38	92	73	71	36	14	13	57	55	46	35	10	25	35	18	25	2	16	11	0	10	6	4	5	5	4	5	5	14	11	13	15	13	14
48	23	65	106	40	75	19	13	30	71	30	40	29	10	35	35	10	35	5	14	7	0	9	3	4	5	4	1	4	4	13	13	15	15	14	15
18	86	18	24	121	35	13	51	13	13	86	23	5	35	5	11	35	12	19	5	32	15	5	4	5	4	5	5	1	4	11	15	11	14	15	15
68	64	71	97	84	75	38	32	41	67	52	45	30	32	30	30	32	30	2	11	0	1	9	0	4	5	4	4	4	4	15	14	15	15	14	15
42	18	18	46	18	18	14	13	13	17	13	13	28	5	5	29	5	5	13	6	31	13	6	31	5	5	5	5	5	5	14	13	8	14	13	6
27	59	23	33	73	118	13	24	13	16	38	91	14	35	10	21	35	27	9	7	2	5	6	2	5	5	2	5	5	1	14	15	14	15	15	15
83	18	39	123	18	82	52	13	19	90	13	52	31	5	20	33	5	30	2	38	3	2	33	1	1	5	4	1	5	4	15	6	14	15	9	14
67	18	89	119	32	94	32	13	54	84	17	59	35	5	35	35	15	35	0	25	8	0	24	7	4	5	4	1	5	4	15	7	15	15	11	15
47	33	53	73	78	104	17	15	38	43	50	75	30	18	15	30	28	29	6	8	1	0	4	1	4	5	4	3	5	1	13	15	15	13	15	15
106	83	19	126	118	92	76	48	13	91	83	65	30	35	6	35	35	27	0	5	11	0	4	4	1	4	4	1	2	3	15	15	13	15	15	15
44	18	44	98	23	63	32	13	27	80	13	42	12	5	17	18	10	21	4	28	5	4	28	2	3	5	4	2	5	4	13	8	14	14	8	15
18	75	105	18	126	119	13	40	70	13	91	84	5	35	35	5	35	35	37	2	0	36	1	0	5	4	3	4	2	2	9	15	15	10	15	15
46	90	102	118	99	125	22	55	67	83	64	90	24	35	35	35	35	35	5	2	4	1	0	4	4	4	2	2	4	1	15	15	15	15	15	15
	18	112		29	122		13	77		20	87		5	35		9	35		13	0		11	0		5	1		4	0		9	15		11	15
	18	18		49	34		13	13		34	22		5	5		15	12		26	16		10	6		5	5		4	5		8	12		13	14
	38	30		51	45		19	18		32	35		19	12		19	10		4	11		4	5		4	5		4	5		14	13		14	14
	32	96		73	102		16	61		48	67		16	35		25	35		4	3		0	2		4	3		4	3		15	15		15	15
	18	18		18	34		13	13		13	18		5	5		5	16		39	27		39	4		5	5		5	5		8	7		9	14
	40	48		75	64		17	20		40	36		23	28		35	28		11	6		9	6		4	5		4	5		15	15		15	15
	78	18		91	28		53	13		59	14		25	5		32	14		4	27		2	11		4	5		4	5		15	3		15	13
	21	58		26	125		13	31		13	90		8	27		13	35		36	1		27	0		5	4		5	2		9	15		12	15
	37	81		117	114		17	48		87	79		20	33		30	35		15	3		3	1		4	4		3	0		12	15		15	15
	93	100		126	126		58	67		91	91		35	33		35	35		0	0		0	0		2	4		1	0		15	15		15	15
	43	18		46	26		13	13		16	15		30	5		30	11		14	20		14	7		4	5		4	5		14	7		14	13
	18	34		18	89		13	13		13	54		5	21		5	35		32	13		32	7		5	5		5	4		8	15		8	15
	59	21		123	21		27	13		90	13		32	8		33	8		6	25		1	16		1	5		0	5		15	13		15	14
	20	107		27	109		13	77		14	79		7	30		13	30		19	6		11	5		5	3		5	2		13	15		14	15
	18	19		28	37		13	14		18	29		5	5		10	8		19	16		13	5		5	5		5	4		9	12		13	14
	96	18		109	18		61	13		74	13		35	5		35	5		2	35		2	35		2	5		1	5		15	4		15	4
	57	18		85	18		31	13		58	13		26	5		27	5		3	22		2	19		4	5		4	5		14	9		15	9
	119	62		121	107		84	32		86	72		35	30		35	35		2	6		2	4		1	5		1	3		15	15		15	15
	19	82		42	82		13	51		31	51		6	31		11	31		9	8		7	4		5	4		5	4		11	14		14	15
	67	18		73	18		54	13		60	13		13	5		13	5		5	39		5	35		4	5		4	5		13	3		13	7
	78	29		97	51		44	20		63	33		34	9		34	18		3	15		0	8		5	4		4	4		15	10		15	11
	43	18		88	84		22	13		67	54		21	5		21	30		2	9		2	1		4	5		4	4		15	9		15	14
		83			102			52			71			31			31			1			1			2			1			15			15
		97			110			67			80			30			30			4			1			4			1			15			15
		35			61			15			36			20			25			10			6			5			3			14			14
		80			82			45			47			35			35			10			10			5			4			15			15
		37			37			13			13			24			24			12			11			5			5			13			14
		26			29			13			14			13			15			17			12			5			5			15			15
		113			125			78			90			35			35			1			0			3			2			15			15
		22			77			13			52			9			25			20			10			5			5			14			15
		25			39			15			23			10			16			7			4			5			4			13			14
		18			18			13			13			5			5			32			21			5			5			8			11
		18			18			13			13			5			5			40			39			5			5			6			9
		82			86			52			55			30			31			5			5			5			5			14			14
		103			110			69			75			34			35			2			1			2			1			15			15
		64			82			29			47			35			35			3			3			4			4			15			15
		19			21			13			13			6			8			21			17			5			5			11			13
		66			66			31			31			35			35			5			5			4			4			15			15
		72			93			37			58			35			35			3			3			5			5			15			15
		34			35			13			14			21			21			18			14			4			4			12			15
		88			115			53			80			35			35			1			1			4			3			15			15
		41			41			13			13			28			28			14			12			5			5			14			14
		18			18			13			13			5			5			38			38			5			5			3			4
		88			110			54			76			34			34			0			0			3			2			15			15
		77			90			53			66			24			24			6			4			4			4			14			15
		18			20			13			13			5			7			34			22			5			4			6			13

## Sheet: Sheet3
⊿Total FIM			⊿FIM mortor subscale			⊿FIM cognition subscale
24<	24-48	>48	24<	24-48	>48	24<	24-48	>48
25	16	0	34	16	0	-9	0	0
40	52	10	39	38	10	1	14	0
16	8	8	12	8	8	4	0	0
57	0	20	52	0	20	5	0	0
15	30	19	8	25	19	7	5	0
62	12	3	47	11	0	15	1	3
39	3	13	39	3	6	0	0	7
41	8	1	29	8	1	12	0	0
29	65	33	29	54	19	0	11	14
15	47	57	15	38	57	0	9	0
33	16	43	24	16	43	9	0	0
43	15	20	32	20	20	11	-5	0
12	10	0	11	6	0	1	4	0
8	0	23	3	0	23	5	0	0
46	2	53	46	0	33	0	2	20
36	8	10	32	6	4	4	2	6
25	9	19	21	9	19	4	0	0
23	20	4	11	20	4	12	0	0
72	23	26	54	23	24	18	0	2
33	34	4	33	34	0	0	0	4
24	12	27	23	12	27	1	0	0
27	0	53	27	0	31	0	0	22
56	28	3	41	28	0	15	0	3
33	0	57	33	0	35	0	0	22
44	11	1	44	12	0	0	-1	1
11	6	7	11	4	4	0	2	3
7	40	12	2	39	10	5	1	2
79	15	23	74	12	20	5	3	3
31	6	46	31	6	16	0	0	30
13	14	43	10	14	34	3	0	9
49	35	74	39	35	69	10	0	5
21	49	33	21	41	33	0	8	0
58	17	10	52	17	10	6	0	0
6	35	17	0	35	10	6	0	7
29	20	4	29	20	4	0	0	0
4	0	0	3	0	0	1	0	0
6	14	95	3	14	78	7	0	17
40	0	43	38	0	33	2	0	10
52	14	5	52	4	5	0	10	0
26	45	51	26	35	37	0	10	14
20	35	73	15	35	52	5	0	21
54	5	19	48	0	15	6	5	4
0	51	14	0	51	14	0	0	0
72	9	23	61	9	23	11	0	0
	11	10		7	10		4	0
	31	16		21	9		10	7
	13	15		13	17		0	-2
	41	6		32	6		9	0
	0	16		0	5		0	11
	35	16		23	16		12	0
	13	10		6	1		7	9
	5	67		0	59		5	8
	80	33		70	31		10	2
	33	26		33	24		0	2
	3	8		3	2		0	6
	0	55		0	41		0	14
	64	0		63	0		1	0
	7	2		1	2		6	0
	10	18		5	15		5	3
	13	0		13	0		0	0
	28	0		27	0		1	0
	2	45		2	40		0	5
	23	0		18	0		5	0
	6	0		6	0		0	0
	19	22		19	13		0	9
	45	66		45	41		0	25
		19			19			0
		13			13			0
		26			21			5
		2			2			0
		0			0			0
		3			1			2
		12			12			0
		55			39			16
		14			8			6
		0			0			0
		0			0			0
		4			3			1
		7			6			1
		18			18			0
		2			0			2
		0			0			0
		21			21			0
		1			1			0
		27			27			0
		0			0			0
		0			0			0
		22			22			0
		13			13			0
		2			0			2
